# Supplementary material for: Pilot Study of Pesticide Knowledge, Attitudes, and Practices among Pregnant Women in Northern Thailand
Source: Int J Environ Res Public Health. 2012 Sep 19;9(9):3365–83. doi: 10.3390/ijerph9093365 (PMC3499875; doi:10.3390/ijerph9093365)
Supplement: Supplementary File 1: — PDF-Document (PDF, 721 KB) [file ijerph-09-03365-s001.pdf]

## Chiang Mai Birth Cohort – Pilot Study KAP QUESTIONNAIRE (Interview immediately after enrollment)

Hello, my name is \_\_\_\_\_. I want to start by thanking you for your help with this survey. I want to let you know that all of your answers to these questions are completely confidential. If you feel uncomfortable answering any of these questions, please let me know. We would appreciate your being as honest as possible in your answers. Do you have any questions before we begin? Thank you for helping us with this important project!

| INTERVIEWER USE ONLY                                                                                      |                                                                                                                                                                                                                                                            |
|-----------------------------------------------------------------------------------------------------------|------------------------------------------------------------------------------------------------------------------------------------------------------------------------------------------------------------------------------------------------------------|
| Interviewer initials                                                                                      | _____ <input type="text"/> <input type="text"/> <input type="text"/>                                                                                                                                                                                       |
| Interview date                                                                                            | <input type="text"/> <input type="text"/> / <input type="text"/> <input type="text"/> / <input type="text"/> <input type="text"/> <input type="text"/> <input type="text"/><br><div style="text-align: center; font-size: small;">Day / Month / Year</div> |
| Interview start time                                                                                      | <input type="text"/> <input type="text"/> : <input type="text"/> <input type="text"/>                                                                                                                                                                      |
| Language of interview<br>Thai.....01<br>Thai Yai.....02<br>Burmese.....03<br>Other (SPECIFY) _____.....04 |                                                                                                                                                                                                                                                            |
| Patient's due date                                                                                        | <input type="text"/> <input type="text"/> / <input type="text"/> <input type="text"/> / <input type="text"/> <input type="text"/> <input type="text"/> <input type="text"/><br><div style="text-align: center; font-size: small;">Day / Month / Year</div> |

1. What month of pregnancy are you in?

\_\_\_\_\_ MONTH OF PREGNANCY

|    |                                                                                                                                                                                                                                                                                                                      | A. Job 1 or most recent job                                                                 |
|----|----------------------------------------------------------------------------------------------------------------------------------------------------------------------------------------------------------------------------------------------------------------------------------------------------------------------|---------------------------------------------------------------------------------------------|
| 8. | <u>Since you became pregnant</u> , at this job have you done any agricultural work? (including fertilizer handling and application, agricultural pesticide handling, equipment or tractor operation, foreman of agricultural work, farm field work, packing shed work, nursery or greenhouse work, or waxing fruits) | YES.....01<br>NO.....02                                                                     |
| 11 | <u>During this pregnancy</u> , at this job did you do...<br><br>i. Golf course or other landscape maintenance? .....<br><br>ii. Control for termites or other pests in homes or buildings? .....<br><br>iii. Work in a cannery or food processing plant where you handle fruits or vegetables? .....                 | YES .....01<br>NO .....02<br><br>YES .....01<br>NO .....02<br><br>YES .....01<br>NO .....02 |
| 12 | <u>Since you became pregnant</u> , do/did you apply pesticides or insecticides at this job?                                                                                                                                                                                                                          | YES.....01<br>NO.....02                                                                     |
| 16 | <u>Since you became pregnant</u> , are/were pesticides or insecticides used at this job?<br>(CODE 777 IF NOT WORKING)                                                                                                                                                                                                | YES.....01<br>NO(GOTO18)02<br>NA(GOTO18)NA                                                  |

[illegible]

|     |                                                                                                |                          |
|-----|------------------------------------------------------------------------------------------------|--------------------------|
| 30. | <u>In the year before you became pregnant, have you done...</u>                                |                          |
|     | A. Farm field work?.....                                                                       | YES..... 01<br>NO.....02 |
|     | B. Packing, canning, or food processing where you handled fruits, vegetables, or flowers?..... | YES..... 01<br>NO.....02 |
|     | C. Nursery or greenhouse work?.....                                                            | YES..... 01<br>NO.....02 |
|     | D. Golf course or landscape maintenance?.....                                                  | YES..... 01<br>NO.....02 |

## B. Housing Characteristics

|                                                                                                                             | A...since you became pregnant?                                                                         | B...in the year before you became pregnant?                                                            |
|-----------------------------------------------------------------------------------------------------------------------------|--------------------------------------------------------------------------------------------------------|--------------------------------------------------------------------------------------------------------|
| 10. How often have your fruits and vegetables been washed before you ate them...                                            | Always.....01<br>Usually.....02<br>Sometimes.....03<br>Almost never.....04<br>DK.....888<br>NR.....999 | Always.....01<br>Usually.....02<br>Sometimes.....03<br>Almost never.....04<br>DK.....888<br>NR.....999 |
| 11. Have you eaten fruits and vegetables that came directly from the fields... (Do not include those from your home garden) | Yes.....01<br>No.....02<br>DK.....888<br>NR.....999                                                    | Yes.....01<br>No.....02<br>DK.....888<br>NR.....999                                                    |

### C. House Cleaning

---

|                                      |                                  |     |
|--------------------------------------|----------------------------------|-----|
| 2. How often do you clean your home? | Daily or more often.....         | 01  |
|                                      | A few times a week .....         | 02  |
|                                      | Once a week .....                | 03  |
|                                      | Once every couple of weeks ..... | 04  |
|                                      | Once a month or less often ..... | 05  |
|                                      | DK .....                         | 888 |
|                                      | NR .....                         | 999 |

---

### D. Pesticide Use

---

|                                                                                                                                                                                                                                                                                        |
|----------------------------------------------------------------------------------------------------------------------------------------------------------------------------------------------------------------------------------------------------------------------------------------|
| <p>I would like to ask you some questions about pesticides that have been used in and around any of the homes you have lived in <u>since you became pregnant</u>. Pesticides can come in sprays, bombs, poison pellets or bait, powder, chalk, roach motels, traps, or ant stakes.</p> |
|----------------------------------------------------------------------------------------------------------------------------------------------------------------------------------------------------------------------------------------------------------------------------------------|

---

|                                                                                                                         |              |     |
|-------------------------------------------------------------------------------------------------------------------------|--------------|-----|
| 4. <u>Since you became pregnant</u> , have pesticides or insecticides been used around any of your homes to kill pests? | YES .....    | 01  |
|                                                                                                                         | NO... ..     | 02  |
|                                                                                                                         | DK .....     | 888 |
| 4C. Were these pesticides used inside or outside your home?                                                             | INSIDE ..... | 01  |
|                                                                                                                         | OUTSIDE..... | 02  |
|                                                                                                                         | BOTH .....   | 03  |
|                                                                                                                         | DK .....     | 888 |

4E. How often have these pesticides been applied?      Daily ..... 01  
                                                                                  Weekly..... 02  
                                                                                  1 to 3 times per month ..... 03  
                                                                                  <1 time per month ..... 04  
                                                                                  DK ..... 888

4F. Did you personally apply any of these pesticides?      YES ..... 01  
                                                                                  NO ..... 02  
                                                                                  DK ..... 888

**5. (SKIP IF SHE DID NOT PERSONALLY APPLY PESTICIDE)**

When you applied the pesticides, did you wear any      YES ..... 01  
 protective clothing such as gloves or mask?      NO ..... 02  
                                                                                  DK ..... 888

---

|     |                                                                  |                                        |
|-----|------------------------------------------------------------------|----------------------------------------|
| 11. | <u>In the year before you became pregnant...</u>                 |                                        |
|     | A. Did <u>you</u> personally apply pesticides at home?.....      | YES..... 01<br>NO.....02<br>DK.....888 |
| 12. | A. Did anyone other than you apply pesticides at your home?..... | YES..... 01<br>NO.....02<br>DK.....888 |

**E. Pesticide Knowledge, Attitudes, Practices**

Now I would like to ask you some general questions about human health and pesticides. Please answer as best you can according to your knowledge and opinions.

| 1. I believe that the following actions could be harmful to my fetus | Yes | No | DK  |
|----------------------------------------------------------------------|-----|----|-----|
| A. Smoking cigarettes                                                | 01  | 02 | 888 |
| B. Eating fruits                                                     | 01  | 02 | 888 |
| C. Drinking alcohol                                                  | 01  | 02 | 888 |
| D. Spraying pesticides in the home                                   | 01  | 02 | 888 |
| E. Spraying pesticides at work                                       | 01  | 02 | 888 |
| F. Light exercise                                                    | 01  | 02 | 888 |
| G. Taking vitamins                                                   | 01  | 02 | 888 |
| H. Taking supplements                                                | 01  | 02 | 888 |

2. Exposure to pesticides can have an adverse effect or impact on human health

AGREE..... 01  
DISAGREE.... (GO TO 4)..... 02  
NOT SURE.... (GO TO 4).... 888

3. If yes, do all the pesticides have the same adverse health effect on the human body?

YES..... 01  
NO..... 02  
NOT SURE..... 888

| 4. Pesticides can be harmful to the health of...     | Yes | No | DK  |
|------------------------------------------------------|-----|----|-----|
| A. The general population                            | 01  | 02 | 888 |
| B. The agricultural workers who apply them           | 01  | 02 | 888 |
| C. Other agricultural workers                        | 01  | 02 | 888 |
| D. People who consume the crops                      | 01  | 02 | 888 |
| E. Farm residents                                    | 01  | 02 | 888 |
| F. Residents of cities and communities near the farm | 01  | 02 | 888 |

| 5. Which of the following are intake pathways for pesticides? | Yes | No | DK  |
|---------------------------------------------------------------|-----|----|-----|
| A. Breathing in pesticides                                    | 01  | 02 | 888 |
| B. Getting bit by a mosquito                                  | 01  | 02 | 888 |
| C. Getting pesticides on the skin                             | 01  | 02 | 888 |
| D. Swallowing pesticides                                      | 01  | 02 | 888 |
| E. Consuming foods from farms that use pesticides             | 01  | 02 | 888 |

---

6. It is necessary to read or understand the label of a pesticide bottle or container.

AGREE.....01  
 DISAGREE.....02  
 NOT SURE.....888

---

7. Pesticide containers can be reused safely after cleaning.

AGREE.....01  
 DISAGREE.....02  
 NOT SURE.....888

| 8. Which of the following can be effective in preventing pesticide exposure? | Yes | No | DK  |
|------------------------------------------------------------------------------|-----|----|-----|
| A. Wearing full protective equipment when handling pesticides                | 01  | 02 | 888 |
| B. Wearing gloves when handling pesticides                                   | 01  | 02 | 888 |
| C. Washing fruits and vegetables before eating them                          | 01  | 02 | 888 |
| D. Covering mouth and nose with your hand while spraying pesticides          | 01  | 02 | 888 |
| E. Washing hands in the stream after handling pesticides                     | 01  | 02 | 888 |
| F. Taking a bath immediately after spraying pesticides                       | 01  | 02 | 888 |
| G. Washing clothes worn at the farm separate from other clothes              | 01  | 02 | 888 |

| 9. According to your knowledge, the toxicity symptoms of pesticides can be which of the following? | Yes | No | DK  |
|----------------------------------------------------------------------------------------------------|-----|----|-----|
| A. Headache                                                                                        | 01  | 02 | 888 |
| B. Watery eyes / sore eyes                                                                         | 01  | 02 | 888 |
| C. Heart attack / stroke                                                                           | 01  | 02 | 888 |
| D. Nausea / vomiting                                                                               | 01  | 02 | 888 |
| E. Excessive salivation                                                                            | 01  | 02 | 888 |
| F. Cough / cold / chest pain / breathlessness                                                      | 01  | 02 | 888 |
| G. Skin rash / skin irritation / itching                                                           | 01  | 02 | 888 |
| H. Abdominal pain / diarrhea                                                                       | 01  | 02 | 888 |
| I. Muscle weakness / fatigue / body pain                                                           | 01  | 02 | 888 |

10. Have you received training about pesticides?

YES..... 01

NO.....(GO TO 12) ..... 02

NOT SURE .....(GO TO 12) ..... 888

11. If yes, please answer the following:

A. Where did you receive training? \_\_\_\_\_

B. When did you last receive training? \_\_\_\_\_

C. What topics were discussed in this training?

|                                   | Yes | No | DK  |
|-----------------------------------|-----|----|-----|
| i. Pesticide poisoning            | 01  | 02 | 888 |
| ii. Personal protective equipment | 01  | 02 | 888 |
| iii. Health effects of pesticides | 01  | 02 | 888 |
| iv. Proper spraying techniques    | 01  | 02 | 888 |
| v. Other, specify _____           | 01  | 02 | 888 |

| Do you agree or disagree with the following statements?                                                  | Agree | Disagree | Not sure |
|----------------------------------------------------------------------------------------------------------|-------|----------|----------|
| 12. Pesticides protect people from pest-related diseases                                                 | 01    | 02       | 888      |
| 13. Pesticides are poisonous                                                                             | 01    | 02       | 888      |
| 14. Pesticide hazard can cause death                                                                     | 01    | 02       | 888      |
| 15. You can smoke, drink, and eat during pesticide spraying                                              | 01    | 02       | 888      |
| 16. Using a large amount of pesticides for only a short time is not harmful to my health                 | 01    | 02       | 888      |
| 17. Using a large amount of pesticides for only a short time is not harmful to the health of my fetus    | 01    | 02       | 888      |
| 18. Using a small amount of pesticides for a long time is not harmful to my health                       | 01    | 02       | 888      |
| 19. Using a small amount of pesticides for a long time is not harmful to the health of my fetus          | 01    | 02       | 888      |
| 20. Adults are more resistant to pesticides than children                                                | 01    | 02       | 888      |
| 21. Adults are more resistant to pesticides than babies                                                  | 01    | 02       | 888      |
| 22. If I eat and drink near areas where pesticides have been sprayed I will not be exposed to pesticides | 01    | 02       | 888      |

|                                                                                                                                             |    |    |     |
|---------------------------------------------------------------------------------------------------------------------------------------------|----|----|-----|
| 23. If a pesticide is sold in the market it means it is safe no matter how or by whom it is used                                            | 01 | 02 | 888 |
| 24. A pesticide is effective only if its effect can be seen immediately after spraying                                                      | 01 | 02 | 888 |
| 25. A pesticide is more effective if it is sprayed according to personal experience and not necessarily according to the recommended amount | 01 | 02 | 888 |
| 26. Every person who uses a pesticide is responsible for its safe use                                                                       | 01 | 02 | 888 |
| 27. After using pesticides for a number of years, a person can develop an immunity to pesticides                                            | 01 | 02 | 888 |

| 28. Which of the following are potential health impacts of pesticides? | Yes | No | DK  |
|------------------------------------------------------------------------|-----|----|-----|
| A. Pesticide poisoning                                                 | 01  | 02 | 888 |
| B. Cancer                                                              | 01  | 02 | 888 |
| C. Obesity                                                             | 01  | 02 | 888 |
| D. Slower learning                                                     | 01  | 02 | 888 |
| E. Irritated skin                                                      | 01  | 02 | 888 |
| F. Coughing                                                            | 01  | 02 | 888 |

| 29. I use pesticides in the home because...                                                          | Yes | No | DK  |
|------------------------------------------------------------------------------------------------------|-----|----|-----|
| A. They protect my home and family from mosquitoes                                                   | 01  | 02 | 888 |
| B. They protect my home and family from other insects                                                | 01  | 02 | 888 |
| C. They protect my home and family from rodents                                                      | 01  | 02 | 888 |
| D. They protect my home and family from termites                                                     | 01  | 02 | 888 |
| E. They protect my home and family from other pests                                                  | 01  | 02 | 888 |
| F. They protect my home and family from disease                                                      | 01  | 02 | 888 |
| G. They keep my home clean                                                                           | 01  | 02 | 888 |
| H. A family member told me to                                                                        | 01  | 02 | 888 |
| I. Following advice from a doctor, nurse, community leader, health volunteer, or government official | 01  | 02 | 888 |
| J. Other, Specify _____                                                                              | 01  | 02 | 888 |

| 30. I use pesticides at work because...             | Yes | No | DK  |
|-----------------------------------------------------|-----|----|-----|
| A. They kill insects that would harm the plants     | 01  | 02 | 888 |
| B. They kill other pests that would harm the plants | 01  | 02 | 888 |
| C. They get rid of bacteria growing on the plants   | 01  | 02 | 888 |
| D. They kill other unwanted plants                  | 01  | 02 | 888 |
| E. They make the plants grow taller                 | 01  | 02 | 888 |
| F. I am told to apply them                          | 01  | 02 | 888 |
| G. Other, Specify _____                             | 01  | 02 | 888 |

**F. Demographics**

1. How old are you? \_\_\_\_\_ YEARS OLD

4. What is the last grade that you completed in school?

|                                           |    |
|-------------------------------------------|----|
| None, never attended school.....          | 01 |
| P. 1-6 (primary).....                     | 02 |
| M. 1-3 (junior high/high school) .....    | 03 |
| M. 4-6 (high school/no diploma) .....     | 04 |
| Diploma/technical school/equivalent ..... | 05 |
| Some college .....                        | 06 |
| College graduate or more .....            | 07 |

5. Are you currently attending school?

|          |     |
|----------|-----|
| Yes..... | 01  |
| No ..... | 02  |
| DK.....  | 888 |
| NR.....  | 999 |

7. How much money do you and other people who live in your home bring home each month?  
(READ CATEGORIES)

|                             |     |
|-----------------------------|-----|
| 1,500 Baht or less .....    | 01  |
| 1,501 to 3,000 Baht.....    | 02  |
| 3,001 to 6,000 Baht.....    | 03  |
| 6,001 to 9,000 Baht.....    | 04  |
| 9,001 to 12,000 Baht .....  | 05  |
| More than 12,000 Baht ..... | 06  |
| DK.....                     | 888 |
| NR.....                     | 999 |

9. Think about where you live, the food you eat, and the things you can afford to do and buy.  
Do you think you can afford these with your household income?

|                                                       |    |
|-------------------------------------------------------|----|
| Yes, I can afford and have enough for saving.....     | 01 |
| Yes, I can afford and not have enough for saving..... | 02 |
| No.....                                               | 03 |

## SECTION C

10. Now I would like to ask you some questions about your ethnicity. What ethnic group best describes you?

Thai..... 01  
 Thai Yai..... 02  
 Burmese..... 03  
 Chinese..... 04  
 Other (SPECIFY) ..... 05  
 DK..... 888  
 NR..... 999

11. In what country were you born?

Thailand..... 01  
 Burma ..... 02  
 China..... 03  
 Other (SPECIFY) ..... 04  
 DK..... 888  
 NR..... 999

## G. Medical History

Now I would like to ask you questions about any vitamins that you take or have taken in the three months before pregnancy up until now.

19. In the 3 months before you became pregnant, did you take any prenatal or multivitamins?

Yes..... 01  
 No..... 02  
 DK..... 888  
 NR..... 999

20. Since you became pregnant, have you taken any prenatal or multivitamins?

Yes..... 01  
 No..... 02  
 DK..... 888  
 NR..... 999

## H. Pregnancy History

- |                                                                                                                            |                |
|----------------------------------------------------------------------------------------------------------------------------|----------------|
| 1. Excluding this pregnancy, how many times have you been pregnant?<br>(Probe: No matter what happened with the pregnancy) | _____ TIMES    |
|                                                                                                                            | DK..... 888    |
|                                                                                                                            | NR ..... 999   |
| <hr/>                                                                                                                      |                |
| 2. How many children do you have that are currently living with you?                                                       | _____ CHILDREN |
|                                                                                                                            | DK..... 888    |
|                                                                                                                            | NR ..... 999   |
| <hr/>                                                                                                                      |                |

## I. Paternal Demographics

- |                                                                           |                                              |
|---------------------------------------------------------------------------|----------------------------------------------|
| 1. What is your baby's father's ethnic background?                        | Thai..... 01                                 |
|                                                                           | Thai Yai..... 02                             |
|                                                                           | Burmese..... 03                              |
|                                                                           | Chinese..... 04                              |
|                                                                           | Other (SPECIFY) _____ 05                     |
|                                                                           | DK..... 888                                  |
|                                                                           | NR..... 999                                  |
| <hr/>                                                                     |                                              |
| 2. In what country was your baby's father born?                           | Thailand ..... 01                            |
|                                                                           | Burma ..... 02                               |
|                                                                           | China..... 03                                |
|                                                                           | Other (SPECIFY) _____ 04                     |
|                                                                           | DK..... 888                                  |
|                                                                           | NR..... 999                                  |
| <hr/>                                                                     |                                              |
| 3. What is the last grade that your<br>baby's father completed in school? | None, never attended school..... 01          |
|                                                                           | P. 1-6 (primary)..... 02                     |
|                                                                           | M. 1-3 (junior high/high school) ..... 03    |
|                                                                           | M. 4-6 (high school/no diploma) ..... 04     |
|                                                                           | Diploma/Technical school/equivalent ..... 05 |
|                                                                           | Some college ..... 06                        |
|                                                                           | College graduate or more ..... 07            |
|                                                                           | DK..... 888                                  |
|                                                                           | NR..... 999                                  |
| <hr/>                                                                     |                                              |

**J. Household Members**

|                                                                                                                 |                                                                               |
|-----------------------------------------------------------------------------------------------------------------|-------------------------------------------------------------------------------|
| 1. Do any of the people who live with you work in agriculture?                                                  | YES ..... 01<br>NO ..... 02<br>DK ..... 888                                   |
| 4. Do any of these people (including yourself) usually wear their work shoes into your current home?            | YES ..... 01<br>NO ..... 02<br>DK ..... 888                                   |
| 6. Do any of these people wear their regular work clothes in your home for more than ½ hour before they change? | YES ..... 01<br>NO ..... 02<br>DK ..... 888                                   |
| 8. Are these regular work clothes kept separately from other family clothes?                                    | YES ..... 01<br>NO ..... 02<br>DK ..... 888                                   |
| 12. Are these work clothes mixed with the family wash or washed separately?                                     | Mixed with family wash ..... 01<br>Washed separately ..... 02<br>DK ..... 888 |
| 13. Does anyone store containers or bags of pesticides from work in or around the home you live in now?         | YES ..... 01<br>NO ..... 02<br>DK ..... 888                                   |

**K. Pets**

I would like to know about any pets that have lived inside your home since you became pregnant. Please include any dogs, cats, birds, or other furry pets that belong to you or to anyone who lives inside your home, including people who are not related to you.

2. Since you became pregnant, have you personally applied flea or tick shampoo, dips or powders on any of your pets? YES ..... 01  
 NO ... (GO TO Q. 4) .... 02  
 DK ... (GO TO Q. 4) .. 888
3. Did you wear gloves when you used these products? YES ..... 01  
 NO ..... 02
- 

**M. Personal Habits Information**

Now I would like to ask you some questions about your smoking habits.

6. In the three months before you became pregnant, did you smoke any cigarettes? YES ..... 01  
 NO ..... (GO TO Q. 8) ..... 02  
 DK ..... (GO TO Q. 8) ..... 888
8. Since you became pregnant, have you smoked any cigarettes? YES ..... 01  
 NO ..... (GO TO Q. 10) ..... 02  
 DK ..... (GO TO Q. 10) ..... 888

## **N. Other Exposures and Concerns**

4. Do you know of any effects that pesticides or other environmental exposures in Fang District may have had on you or your family? Please mention any and all problems that come to mind.

YES ..... 01  
NO ..... 02  
DK ..... 888

A. Please explain: \_\_\_\_\_

\_\_\_\_\_

\_\_\_\_\_

\_\_\_\_\_

**Z. Additional Questions**


---

1. How long have you lived in Fang? \_\_\_\_\_ YEARS \_\_\_\_\_ MONTHS  
(99: Since I was born)

---

2. Is your current house near an agricultural area? I live in an agricultural area/orchard/farm ..... 01  
I live near an agricultural area (<500m)..... 02  
I don't live near an agricultural area (>500m)..... 03  
DK..... 888  
NR ..... 999

---

3. What Medicare benefits have you used for antenatal care for this pregnancy? Gold health card ..... 01  
Health insurance card for foreigner ..... 02  
Medicare benefit for officer ..... 03  
Social Security ..... 04  
None (paid by myself) ..... 05  
Other, (SPECIFY) \_\_\_\_\_ 06  
DK ..... 888  
NR ..... 999

---

4. What month of pregnancy was your first visit to ANC? \_\_\_\_\_ MONTHS  
(888: DK)

---

5. During this pregnancy, how many times have you visited ANC? \_\_\_\_\_ TMES  
(888: DK)

---

6. During this pregnancy, have you visited ANC for every regular appointment? Yes, on time every appointment ..... 01  
Yes, but not on time every appointment ..... 02  
No, because ..... 03

---

7. Currently, do you still work? YES (GO TO Q. 8).. 01  
NO.. (GO TO Q. 7A).. 02

---

7A. One year ago, did you work? YES (GO TO Q. 7B).. 01

10. Do you plan to move from Fang? YES.(GO TO Q. 10A). 01  
NO ... (GO TO Q. 11).. 02  
DK.....(GO TO Q. 11). 02

|                                               |                                  |     |
|-----------------------------------------------|----------------------------------|-----|
| 11A. How long will you breast feed your baby? | 3 months after delivery .....    | 01  |
|                                               | 6 months after delivery .....    | 02  |
|                                               | 1 year after delivery .....      | 03  |
|                                               | Over 1 year after delivery ..... | 04  |
|                                               | DK .....                         | 888 |

|                                               |                  |
|-----------------------------------------------|------------------|
| 1. Overall, the respondent's cooperation was: | Excellent.....01 |
|                                               | Good.....02      |
|                                               | Fair.....03      |
|                                               | Poor.....04      |

**Table A1.** Knowledge score calculation.

| Knowledge Questions                                                                             | Response Considered Correct | Source |
|-------------------------------------------------------------------------------------------------|-----------------------------|--------|
| I believe that the following actions could be harmful to my fetus:                              |                             |        |
| Smoking cigarettes                                                                              | Yes                         | [1]    |
| Eating fruits                                                                                   | No                          | [2]    |
| Drinking alcohol                                                                                | Yes                         | [3]    |
| Spraying pesticides in the home                                                                 | Yes                         | [4]    |
| Spraying pesticides at work                                                                     | Yes                         | [5]    |
| Light exercise                                                                                  | No                          | [6]    |
| Taking vitamins                                                                                 | No                          | [7]    |
| Taking supplements                                                                              | No                          | [7]    |
| Exposure to pesticides can have an adverse effect or impact on human health                     | Agree                       | [8]    |
| Do all the pesticides have the same adverse health effect on the human body?                    | No                          | [8]    |
| Pesticides can be harmful to the health of:                                                     |                             |        |
| The general population                                                                          | Yes                         | [9]    |
| The agricultural workers who apply them                                                         | Yes                         | [10]   |
| Other agricultural workers                                                                      | Yes                         | [11]   |
| People who consume the crops                                                                    | Yes                         | [12]   |
| Farm residents                                                                                  | Yes                         | [11]   |
| Residents of cities and communities near the farm                                               | Yes                         | [11]   |
| Which of the following are intake pathways for pesticides?                                      |                             |        |
| Breathing in pesticides                                                                         | Yes                         | [12]   |
| Getting bit by a mosquito                                                                       | No                          |        |
| Getting pesticides on the skin                                                                  | Yes                         | [12]   |
| Swallowing pesticides                                                                           | Yes                         | [12]   |
| Consuming foods from farms that use pesticides                                                  | Yes                         | [12]   |
| Pesticide containers can be reused safely after cleaning                                        | Disagree                    | [11]   |
| Which of the following can be effective in preventing pesticide exposure?                       |                             |        |
| Wearing full protective equipment when handling pesticides                                      | Yes                         | [13]   |
| Wearing gloves when handling pesticides                                                         | Yes                         | [13]   |
| Washing fruits and vegetables before eating them                                                | Yes                         | [11]   |
| Covering mouth and nose with your hand while spraying pesticides                                | No                          | [14]   |
| Washing hands in the stream after handling pesticides                                           | Yes                         | [15]   |
| Taking a bath immediately after spraying pesticides                                             | Yes                         | [15]   |
| Washing clothes worn at the farm separate from other clothes                                    | Yes                         | [11]   |
| According to your knowledge, the toxicity symptoms of pesticides can be which of the following? |                             |        |
| Headache                                                                                        | Yes                         | [11]   |
| Watery eyes / sore eyes                                                                         | Yes                         | [8]    |
| Heart attack / stroke                                                                           | Yes                         | [11]   |
| Nausea / vomiting                                                                               | Yes                         | [11]   |
| Excessive salivation                                                                            | Yes                         | [11]   |
| Cough / cold / chest pain / breathlessness                                                      | Yes                         | [8]    |
| Skin rash / skin irritation / itching                                                           | Yes                         | [11]   |
| Abdominal pain / diarrhea                                                                       | Yes                         | [11]   |
| Muscle weakness / fatigue / body pain                                                           | Yes                         | [11]   |

**Table A1. Cont.**

| Knowledge Questions                                                                                  | Response Considered Correct | Source |
|------------------------------------------------------------------------------------------------------|-----------------------------|--------|
| Pesticides protect people from pest-related diseases                                                 | Agree                       | [16]   |
| Pesticides are poisonous                                                                             | Agree                       | [11]   |
| Pesticide hazard can cause death                                                                     | Agree                       | [17]   |
| You can smoke, drink, and eat during pesticide spraying                                              | Disagree                    | [11]   |
| If I eat and drink near areas where pesticides have been sprayed I will not be exposed to pesticides | Disagree                    | [18]   |
| Which of the following are potential health impacts of pesticides?                                   |                             |        |
| Pesticide poisoning                                                                                  | Yes                         | [19]   |
| Cancer                                                                                               | Yes                         | [20]   |
| Obesity                                                                                              | No *                        | [21]   |
| Slower learning                                                                                      | Yes                         | [22]   |
| Irritated skin                                                                                       | Yes                         | [8]    |
| Coughing                                                                                             | Yes                         | [19]   |

\* Although some prospective epidemiological studies have reported an association between prenatal exposure to dichlorodiphenyl-dichloroethane (DDE) and measures of obesity in childhood, the toxicological evidence is limited and there is a lack of general consensus regarding the potential relationship between pesticide exposure and obesity.

**Table A2. Personal susceptibility attitude score calculation.**

| Attitudes on personal susceptibility to health effects from pesticides *             | Response indicating higher belief in susceptibility ^ |
|--------------------------------------------------------------------------------------|-------------------------------------------------------|
| Using a large amount of pesticides for only a short time is not harmful to my health | Disagree                                              |
| Using a small amount of pesticides for a long time is not harmful to my health       | Disagree                                              |

\* Score ranges from 0–4 with higher scores indicating a higher belief in personal susceptibility to health effects from pesticides.

^ These responses were awarded 2 points, while the opposite response was awarded 0 points. Responses of “not sure” or “don’t know” (indicating beliefs in between the extremes) were awarded 1 point.

**Table A3.** Child susceptibility attitude score calculation.

| Attitudes on future or current children's susceptibility to health effects from pesticides *      | Response indicating higher belief in susceptibility ^ |
|---------------------------------------------------------------------------------------------------|-------------------------------------------------------|
| Using a large amount of pesticides for only a short time is not harmful to the health of my fetus | Disagree                                              |
| Using a small amount of pesticides for a long time is not harmful to the health of my fetus       | Disagree                                              |
| Adults are more resistant to pesticides than children                                             | Agree                                                 |
| Adults are more resistant to pesticides than babies                                               | Agree                                                 |

\* Score ranges from 0–8 with higher scores indicating a higher belief in the participant's child's susceptibility to health effects from pesticides.

^ These responses were awarded 2 points, while the opposite response was awarded 0 points. Responses of “not sure” or “don't know” (indicating beliefs in between the extremes) were awarded 1 point.

**Table A4.** Responsibility attitude score calculation.

| Attitudes on responsibility for safe use based on Sam <i>et al.</i> [23] *                                                              | Response indicating acceptance of responsibility ^ |
|-----------------------------------------------------------------------------------------------------------------------------------------|----------------------------------------------------|
| It is necessary to read or understand the label of a pesticide bottle or container                                                      | Agree                                              |
| If a pesticide is sold in the market it means it is safe no matter how or by whom it is used                                            | Disagree                                           |
| A pesticide is effective only if its effect can be seen immediately after spraying                                                      | Disagree                                           |
| A pesticide is more effective if it is sprayed according to personal experience and not necessarily according to the recommended amount | Disagree                                           |
| Every person who uses a pesticide is responsible for its safe use                                                                       | Agree                                              |
| After using pesticides for a number of years, a person can develop an immunity to pesticides                                            | Disagree                                           |

\* Score ranges from 0–12 with higher scores indicating a higher acceptance of personal responsibility for the safe use of pesticides.

^ These responses were awarded 2 points, while the opposite response was awarded 0 points. Responses of “not sure” or “don't know” (indicating beliefs in between the extremes) were awarded 1 point.

**Table A5.** Usefulness attitude score calculation.

| Attitudes on the usefulness of pesticides *                                                       | Does an affirmative response indicate belief in pesticide usefulness? ^ |
|---------------------------------------------------------------------------------------------------|-------------------------------------------------------------------------|
| I use pesticides in the home because:                                                             |                                                                         |
| They protect my home and family from mosquitoes                                                   | Yes                                                                     |
| They protect my home and family from other insects                                                | Yes                                                                     |
| They protect my home and family from rodents                                                      | Yes                                                                     |
| They protect my home and family from termites                                                     | Yes                                                                     |
| They protect my home and family from other pests                                                  | Yes                                                                     |
| They protect my home and family from disease                                                      | Yes                                                                     |
| They keep my home clean                                                                           | Yes                                                                     |
| A family member told me to                                                                        | No                                                                      |
| Following advice from a doctor, nurse, community leader, health volunteer, or government official | No                                                                      |
| Other                                                                                             | Yes                                                                     |
| I use pesticides at work because:                                                                 |                                                                         |
| They kill insects that would harm the plants                                                      | Yes                                                                     |
| They kill other pests that would harm the plants                                                  | Yes                                                                     |
| They get rid of bacteria growing on the plants                                                    | No                                                                      |
| They kill other unwanted plants                                                                   | Yes                                                                     |
| They make the plants grow taller                                                                  | Yes                                                                     |
| I am told to apply them                                                                           | No                                                                      |
| Other                                                                                             | Yes                                                                     |

\* Score ranges from 0–13 with higher scores indicating a higher belief in the usefulness of pesticides (scored as missing if the participant did not personally apply pesticides).

^ Affirmative responses to questions with a “yes” in this category were awarded 1 point each, while all other responses were awarded 0 points.

**Table A6.** Risky behaviors defined by Goldman *et al.* [24].

| Risky behaviors defined by Goldman <i>et al.</i> [24]                                                                             | Corresponding KAP survey question(s) |
|-----------------------------------------------------------------------------------------------------------------------------------|--------------------------------------|
| Sometimes or never washing hands in the field before smoking or eating                                                            | A20                                  |
| Not bathing immediately after work                                                                                                | A21                                  |
| Not wearing adequate clothing to protect against pesticide exposure (long-sleeved shirt, something to cover the head, and gloves) | A18, D5, K3                          |
| Storing or washing farm-worker clothes together with family clothes                                                               | J8, J12                              |
| Cleaning the house less than a few times per week                                                                                 | C2                                   |
| Eating fruits and vegetables directly from the field                                                                              | B11A                                 |
| Household member(s)wearing work shoes from the field into the home                                                                | J4                                   |
| Household member(s)wearing work clothes from the field into the home for more than 30 minutes                                     | J6                                   |

**Table A7.** Risky behaviors at work score calculation.

| Risky behaviors at work *                                                                                                         | Corresponding KAP survey question(s) |
|-----------------------------------------------------------------------------------------------------------------------------------|--------------------------------------|
| Sometimes or never washing hands in the field before smoking or eating                                                            | A20                                  |
| Not bathing immediately after work                                                                                                | A21                                  |
| Not wearing adequate clothing to protect against pesticide exposure (long-sleeved shirt, something to cover the head, and gloves) | A18                                  |

\* These scores were only calculated for participants who worked in agriculture while pregnant.

**Table A8.** Risky behaviors at home score calculation.

| Risky behaviors at home                                                                          | Corresponding KAP survey question(s) |
|--------------------------------------------------------------------------------------------------|--------------------------------------|
| Not wearing personal protective equipment when using pesticides in the home                      | D5, K3                               |
| Storing or washing farm-worker clothes together with family clothes *                            | J8, J12                              |
| Cleaning the house less than a few times per week                                                | C2                                   |
| Eating fruits and vegetables directly from the field                                             | B11A                                 |
| Household member(s) wearing work shoes from the field into the home *                            | J4                                   |
| Household member(s) wearing work clothes from the field into the home for more than 30 minutes * | J6                                   |
| Household member(s) storing pesticides from work in or around the home                           | J13                                  |

\* Only considered risky when participants had household members who worked in agriculture.

## References

1. Cotton, P. Smoking cigarettes may do developing fetus more harm than ingesting cocaine, some experts say. *J. Am. Med. Assoc.* **1994**, *271*, 576–577.
2. Ortega, R.M. Dietary guidelines for pregnant women. *Public Health Nutr.* **2001**, *4*, 1343–1346.
3. Eustace, L.W.; Kang, D-H.; Coombs, D. Fetal alcohol syndrome: A growing concern for health care professionals. *JOGNN* **2002**, *32*, 215–221.
4. Turner, M.C.; Wigle, D.T.; Krewski, D. Residential pesticides and childhood leukemia: A systematic review and meta-analysis. *Environ. Health Perspect.* **2010**, *118*, 33–41.
5. Wigle, D.T.; Turner, M.C.; Krewski, D. A systematic review and meta-analysis of childhood leukemia and parental occupational pesticide exposure. *Environ. Health Perspect.* **2009**, *117*, 1505–1513.
6. Artal, R.; O'Toole, M. Guidelines of the American College of Obstetricians and Gynecologists for exercise during pregnancy and the postpartum period. *Brit. J. Sport. Med.* **2003**, *37*, 6–12.
7. Haider, B.A.; Bhutta, Z. Multiple-micronutrient supplementation for women during pregnancy. *Cochrane Database Syst. Rev.* **2006**, *4*, doi:10.1002/14651858.CD004905.

8. U.S. Environmental Protection Agency (EPA). *Recognition and Management of Pesticide Poisonings*; fifth ed.; EPA/735/R-98/003; EPA: Washington, DC, USA, **1999**.
9. National Cancer Institute (NCI). *Cancer Trends Progress Report—2009/2010 Update*. National Institutes of Health: Bethesda, MD, USA, 2010.
10. Das, R.; Steege, A.; Baron, S.; Beckman, J.; Harrison, R. Pesticide-related illness among migrant farm workers in the United States. *Int. J. Occup. Env. Heal.* **2001**, *7*, 303–312.
11. U.S. Environmental Protection Agency (EPA). *Citizen's Guide to Pest Control and Pesticide Safety*; EPA/735/K/04/002; EPA: Washington, DC, USA, 2005.
12. McKone, T.E.; Castorina, R.; Harnly, M.E.; Kuwabara, Y.; Eskenazi, B.; Bradman, A. Merging models and biomonitoring data to characterize sources and pathways of human exposure to organophosphorus pesticides in the Salinas Valley of California. *Environ. Sci. Technol.* **2007**, *41*, 3233–3240.
13. Keifer, M.C. Effectiveness of interventions in reducing pesticide overexposure and poisonings. *Am. J. Prev. Med.* **2000**, *18*, 80–89.
14. Palis, F.G.; Flor, R.J.; Warburton, H.; Hossain, M. Our farmers at risk: behaviour and belief system in pesticide safety. *J. Public Health* **2006**, *28*, 43–48.
15. Salvatore, A.L.; Bradman, A.; Castorina, R.; Camacho, J.; Lopez, J.; Barr, D.B.; Snyder, J.; Jewell, N.P.; Eskenazi, B. Occupational behaviors and farmworkers' pesticide exposure: Findings from a study in Monterey County, California. *Am. J. Ind. Med.* **2008**, *51*, 782–794.
16. Guillet, P.; Alnwick, D.; Cham, M.K.; Neira, M.; Zaim, M.; Heymann, D.; Mukelabai, K. Long-lasting treated mosquito nets: A breakthrough in malaria prevention. *Bull. World Health Organ.* **2001**, *79*, 998.
17. Casey, P. Deaths from pesticide poisoning in England and Wales: 1945–1989. *Hum. Exp. Toxicol.* **1994**, *13*, 95–101.
18. Fenske, R.A.; Black, K.G.; Elkner, K.P.; Lee, C.L.; Methner, M.M.; Soto, R. Potential exposure and health risks of infants following indoor residential pesticide applications. *Am. J. Public Health* **1990**, *80*, 689–693.
19. Eskenazi, B.; Bradman, A.; Castorina, R. Exposures of children to organophosphate pesticides and their potential adverse health effects. *Environ. Health Perspect.* **1999**, *107*, 409–419.
20. Vinson, F.; Merhi, M.; Baldi, I.; Raynal, H.; Gamet-Payrastre, L. Exposure to pesticides and risk of childhood cancer: A meta-analysis of recent epidemiological studies. *Occup. Environ. Med.* **2011**, *68*, 694–702.
21. La Merrill, M.; Birnbaum, L.S. Childhood obesity and environmental chemicals. *Mt. Sinai J. Med.* **2011**, *78*, 22–48.
22. Kofman, O.; Berger, A.; Massarwa, A.; Friedman, A.; Jaffar, A.A. Motor inhibition and learning impairments in school-aged children following exposure to organophosphate pesticides in infancy. *Pediatr. Res.* **2006**, *60*, 88–92.
23. Sam, K.G.; Andrade, H.H.; Pradhan, L.; Pradhan, A.; Sones, S.J.; Rao, P.G.; Sudhakar, C. Effectiveness of an educational program to promote pesticide safety among pesticide handlers of South India. *Int. Arch. Occ. Environ. Hea.* **2008**, *81*, 787–795.

24. Goldman, L.; Eskenazi, B.; Bradman, A.; Jewell, N.P. Risk behaviors for pesticide exposure among pregnant women living in farmworker households in Salinas, California. *Am. J. Ind. Med.* **2004**, *45*, 491–499.

© 2012 by the authors; licensee MDPI, Basel, Switzerland. This article is an open access article distributed under the terms and conditions of the Creative Commons Attribution license (<http://creativecommons.org/licenses/by/3.0/>).
